# Supplementary material
Source: publisher figshare collection journal article supplement (https://sage.figshare.com/ndownloader/files/13894424)
Supplement: Supplementary file 1 [file 13894424]

Supplemental Table 10. Zero-order correlations between key variables from Study 4. HPFS = History of Physical Fights, HSAT = Hot Sauce Aggression Task, PADAS = Positive Affect During Aggression Scale, VDAT = Voodoo Doll Aggression Task. Gender is coded: male = 1, female = -1. \* $p < .05$ , \*\* $p < .01$ , \*\*\* $p < .001$

|                                 | 1      | 2      | 3      | 4    | 5      | 6    | 7      |
|---------------------------------|--------|--------|--------|------|--------|------|--------|
| 1. Gender                       |        |        |        |      |        |      |        |
| 2. HPFS - Past Five Years       | .38*** |        |        |      |        |      |        |
| 3. HPFS - Past Year             | .29*** | .78*** |        |      |        |      |        |
| 4. HSAT (Log Transformed)       | .24**  | .11    | .02    |      |        |      |        |
| 5. PADAS - Pleasure             | .21**  | .12    | .17*   | -.01 |        |      |        |
| 6. Short Sadistic Impulse Scale | .23**  | .40*** | .45*** | .06  | .19*   |      |        |
| 7. Taylor Aggression Paradigm   | -.11   | -.04   | .20    | .09  | -.16** | .19* |        |
| 8. VDAT (Log Transformed)       | -.16*  | -.06   | .01    | -.00 | .17*   | .14  | .38*** |
